# Supplementary material
Source: PubMed Central journal article supplement (PMC4081331)
Supplement: supp_pp.114.236901_236901supptbl.pdf [file supp_pp.114.236901_236901supptbl.pdf]

**Table S1.** Primers used in this work.

| <b>GENE</b>      | <b>AGI CODE</b> | <b>FORWARD PRIMER (5'-3')</b>          | <b>REVERSE PRIMER (5'-3')</b>        |
|------------------|-----------------|----------------------------------------|--------------------------------------|
| <i>UBQ5</i>      | AT3G62250       | GTAAAGCTCGCTGTTCTTCAGT                 | TCAAGCTTCAACTCCTTCTTTC               |
| <i>RET-OX</i>    | AT1G26380       | AGGTTCTCGAACCCCTAACACA                 | GCACAGACGACACGTAAGAAAG               |
| <i>CYP81F2</i>   | AT5G57220       | GTGAAAGCACTAGGCGAAGC                   | ATCCGTTCCAGCTAGCATCA                 |
| <i>FRK1</i>      | AT2G19190       | TTAAACTCGACGATGCAACA                   | GATGGAAGTTTTCCCGTTTT                 |
| <i>PAD3</i>      | AT3G26830       | CCGGTGAATCTTGAGAGAGCC                  | GATCAGCTCGGTCATTCCCC                 |
| <i>PHI1</i>      | AT1G35140       | TTGGTTTAGACGGGATGGTG                   | ACTCCAGTACAAGCCGATCC                 |
| <i>ANP1cDNA</i>  | AT1G09000       | CTCGTGGTTTCCTGAAACTGCC                 | GGTGATGCAAACCTCGACTT                 |
| <i>ANP1LP-RP</i> | AT1G09000       | GATAGAGAAGAAGTGAAGG                    | ACTGACCTTTCCTCCACGAA                 |
| <i>ANP3cDNA</i>  | AT3G06030       | ACATCCGAGAGCTTGAGGAA                   | GATGCATGATCCCATTGTTG                 |
| <i>ANP3LP-RP</i> | AT3G06030       | CCTTATCCAGCTTACCGTAATTCT<br>CTTAC      | ATACAGTTTCTCTTTAGCCGTTCA<br>CTATC    |
| <i>IAA5</i>      | AT1G15580       | ACCGAACTACGGCTAGGTCT                   | CTGTTCTTTCTCCGGTACGA                 |
| <i>SAUR16</i>    | AT4G38860       | ACAATGCTACGACGAGGAAG                   | CTTCTTACAAGGGATGGTG                  |
| <i>SAUR-AC1</i>  | AT4G38850       | AAGGGAATCATCGTCGACAC                   | TATTGTTAAGCCGCCATTG                  |
| <i>At5g19110</i> | At5g19110       | GCACGAACCCACCAATCTAT                   | GAGTGGGTTTGGTTGCTTGT                 |
| <i>WAK1</i>      | AT1G21250       | ACAGCACTTGTCTCGATTCT                   | TCTTTACGCTTGCAGCTCAT                 |
| <i>EFR</i>       | AT5G20480       | GGGTAATCTTAGGGCTGATT                   | CTGGACGAGTTATTTCCAAG                 |
| <i>MEKK2</i>     | At4g08480       | TCGATTATGACGCAGGTGAA                   | GCTCCATACGAGCTTTCCAA                 |
| pANP3            | AT3G06030       | AGCTCTGCAGTTCTCTTGATAACA<br>AATAAAGAAC | GA CTGGATCCTTGAGAAGCCGAC<br>GGTGAATG |

|              |           |                      |                      |
|--------------|-----------|----------------------|----------------------|
| <i>RbohD</i> | AT5G47910 | TGGGTGACTAGGGAACAAGG | CGTGTACCCGACACAACATC |
|--------------|-----------|----------------------|----------------------|
